# Supplementary material
Source: Springer Nature journal article supplement (https://www.springermedizin.de/resource/supplementary/13601_2014_1083_MOESM8_ESM.pdf/9678606)

**C**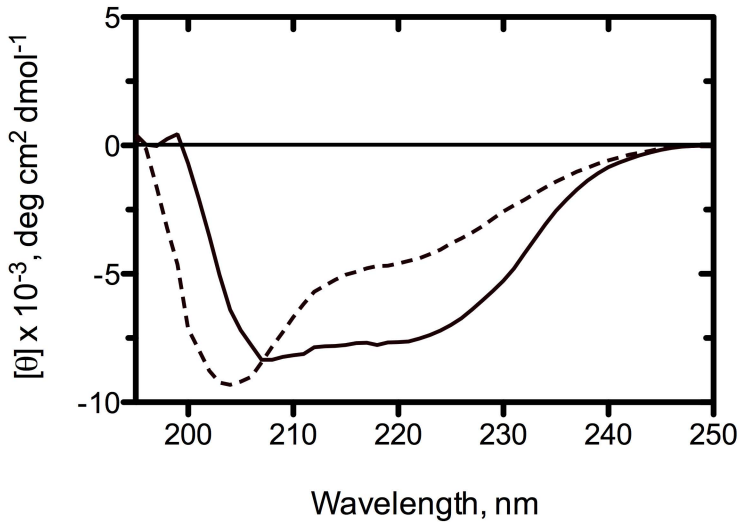

Supplement: MOESM8 [file 9678606]
